# Supplementary figures and images for: Phylodynamic theory of persistence, extinction and speciation of rapidly adapting pathogens
Source: eLife journal article supplement (doi:10.7554/elife.44205), 2019-09-18

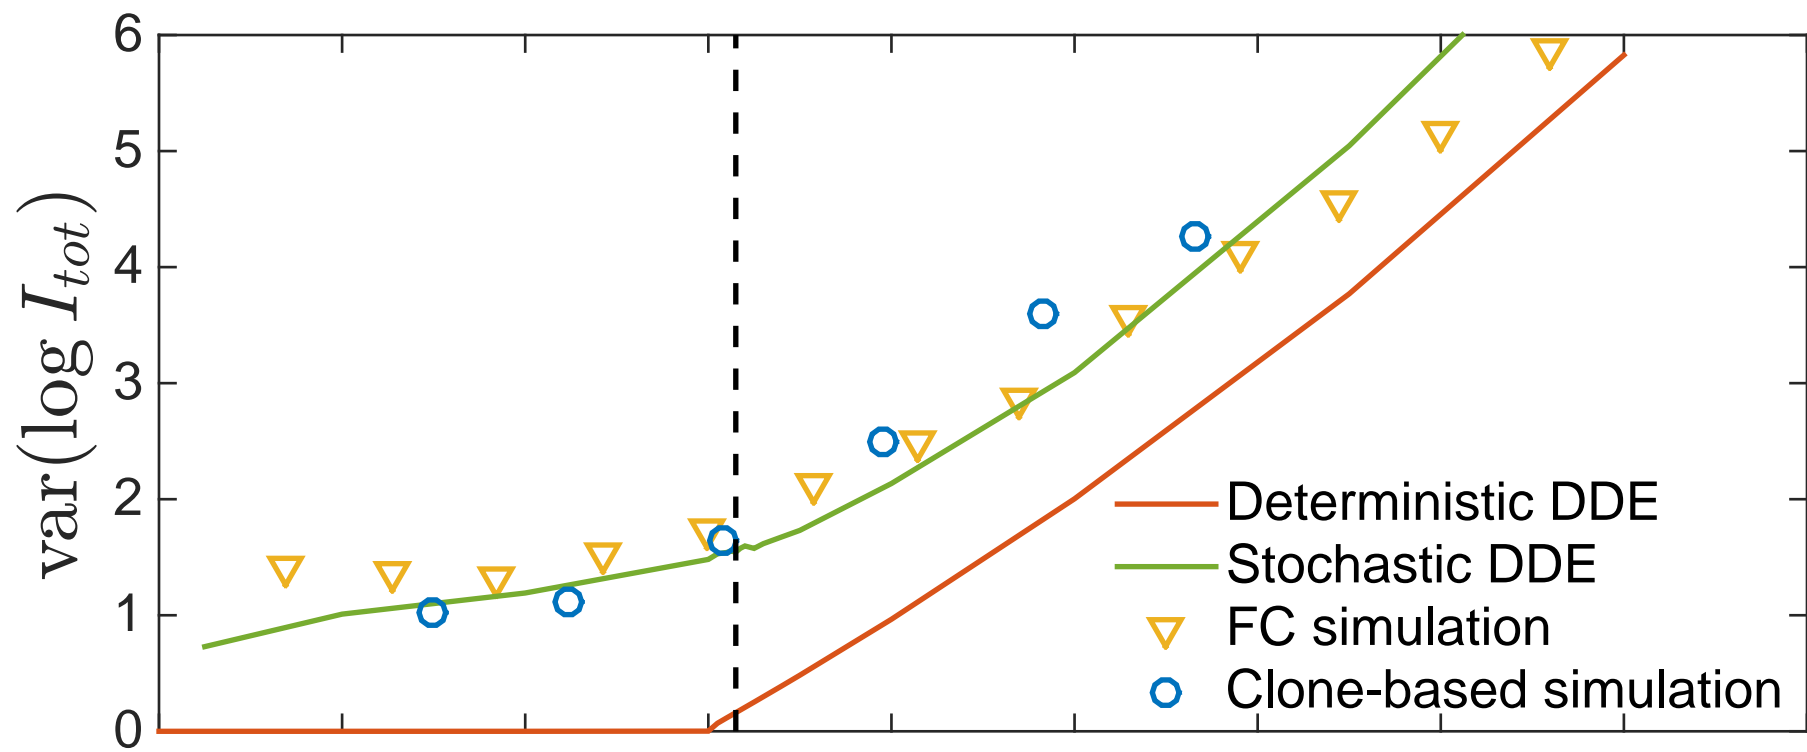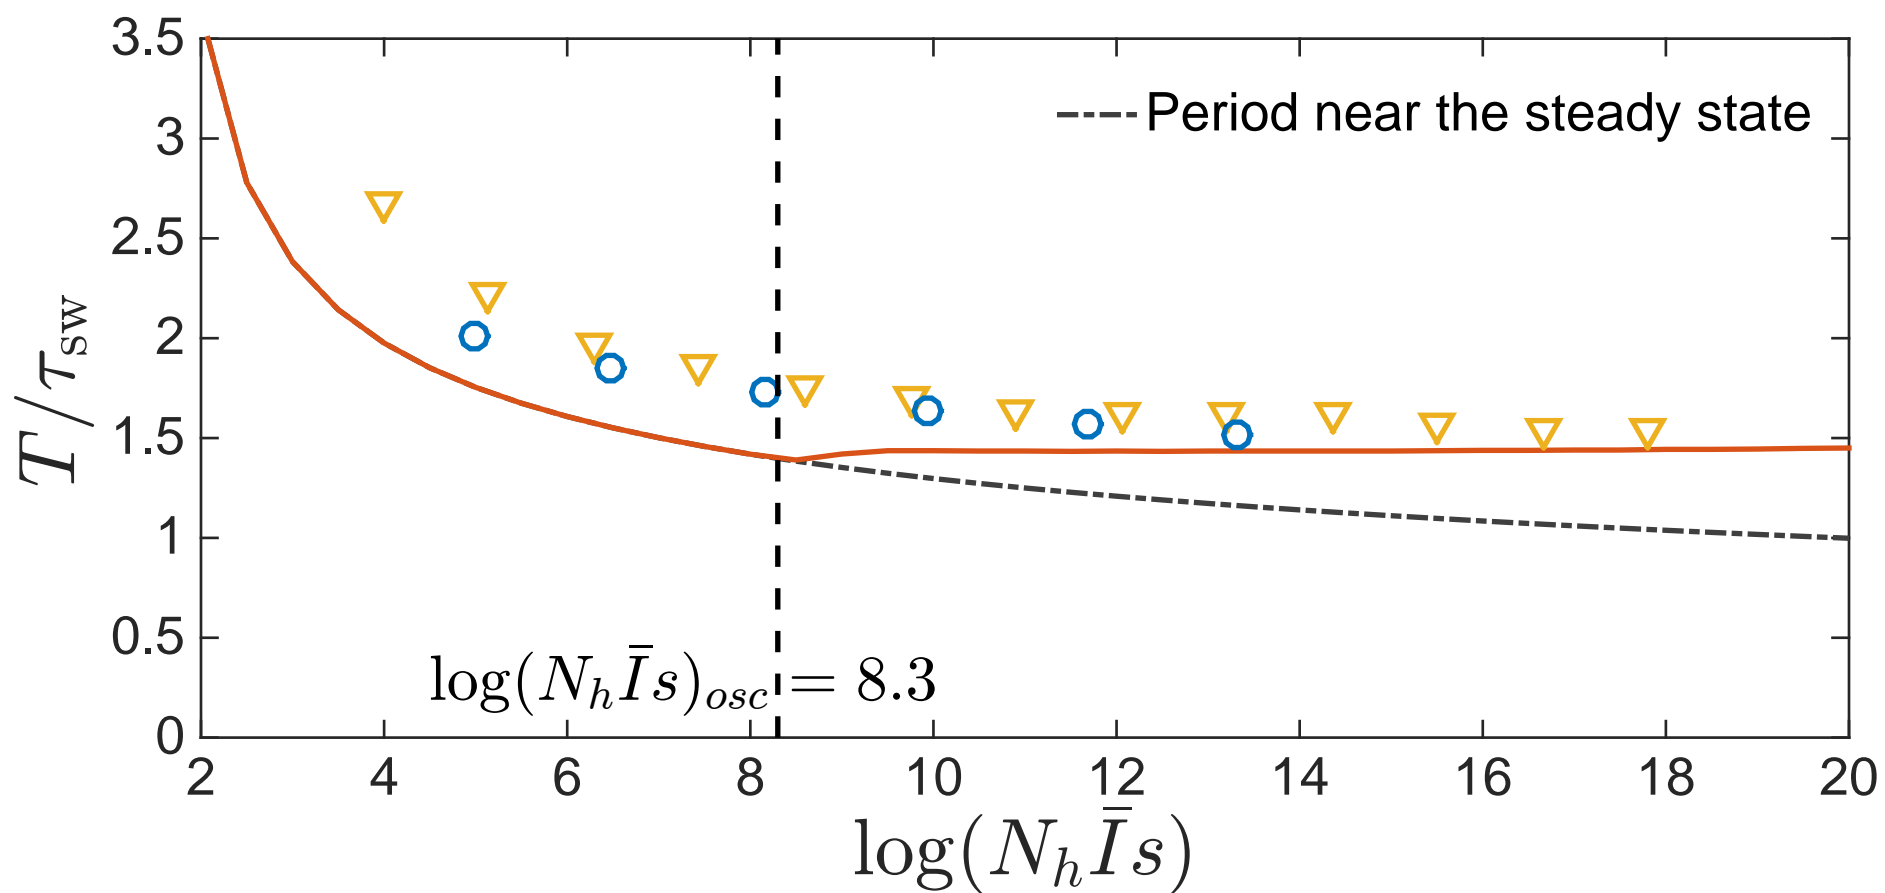

Supplement: supp [file elife-44205-supp-v1.zip]

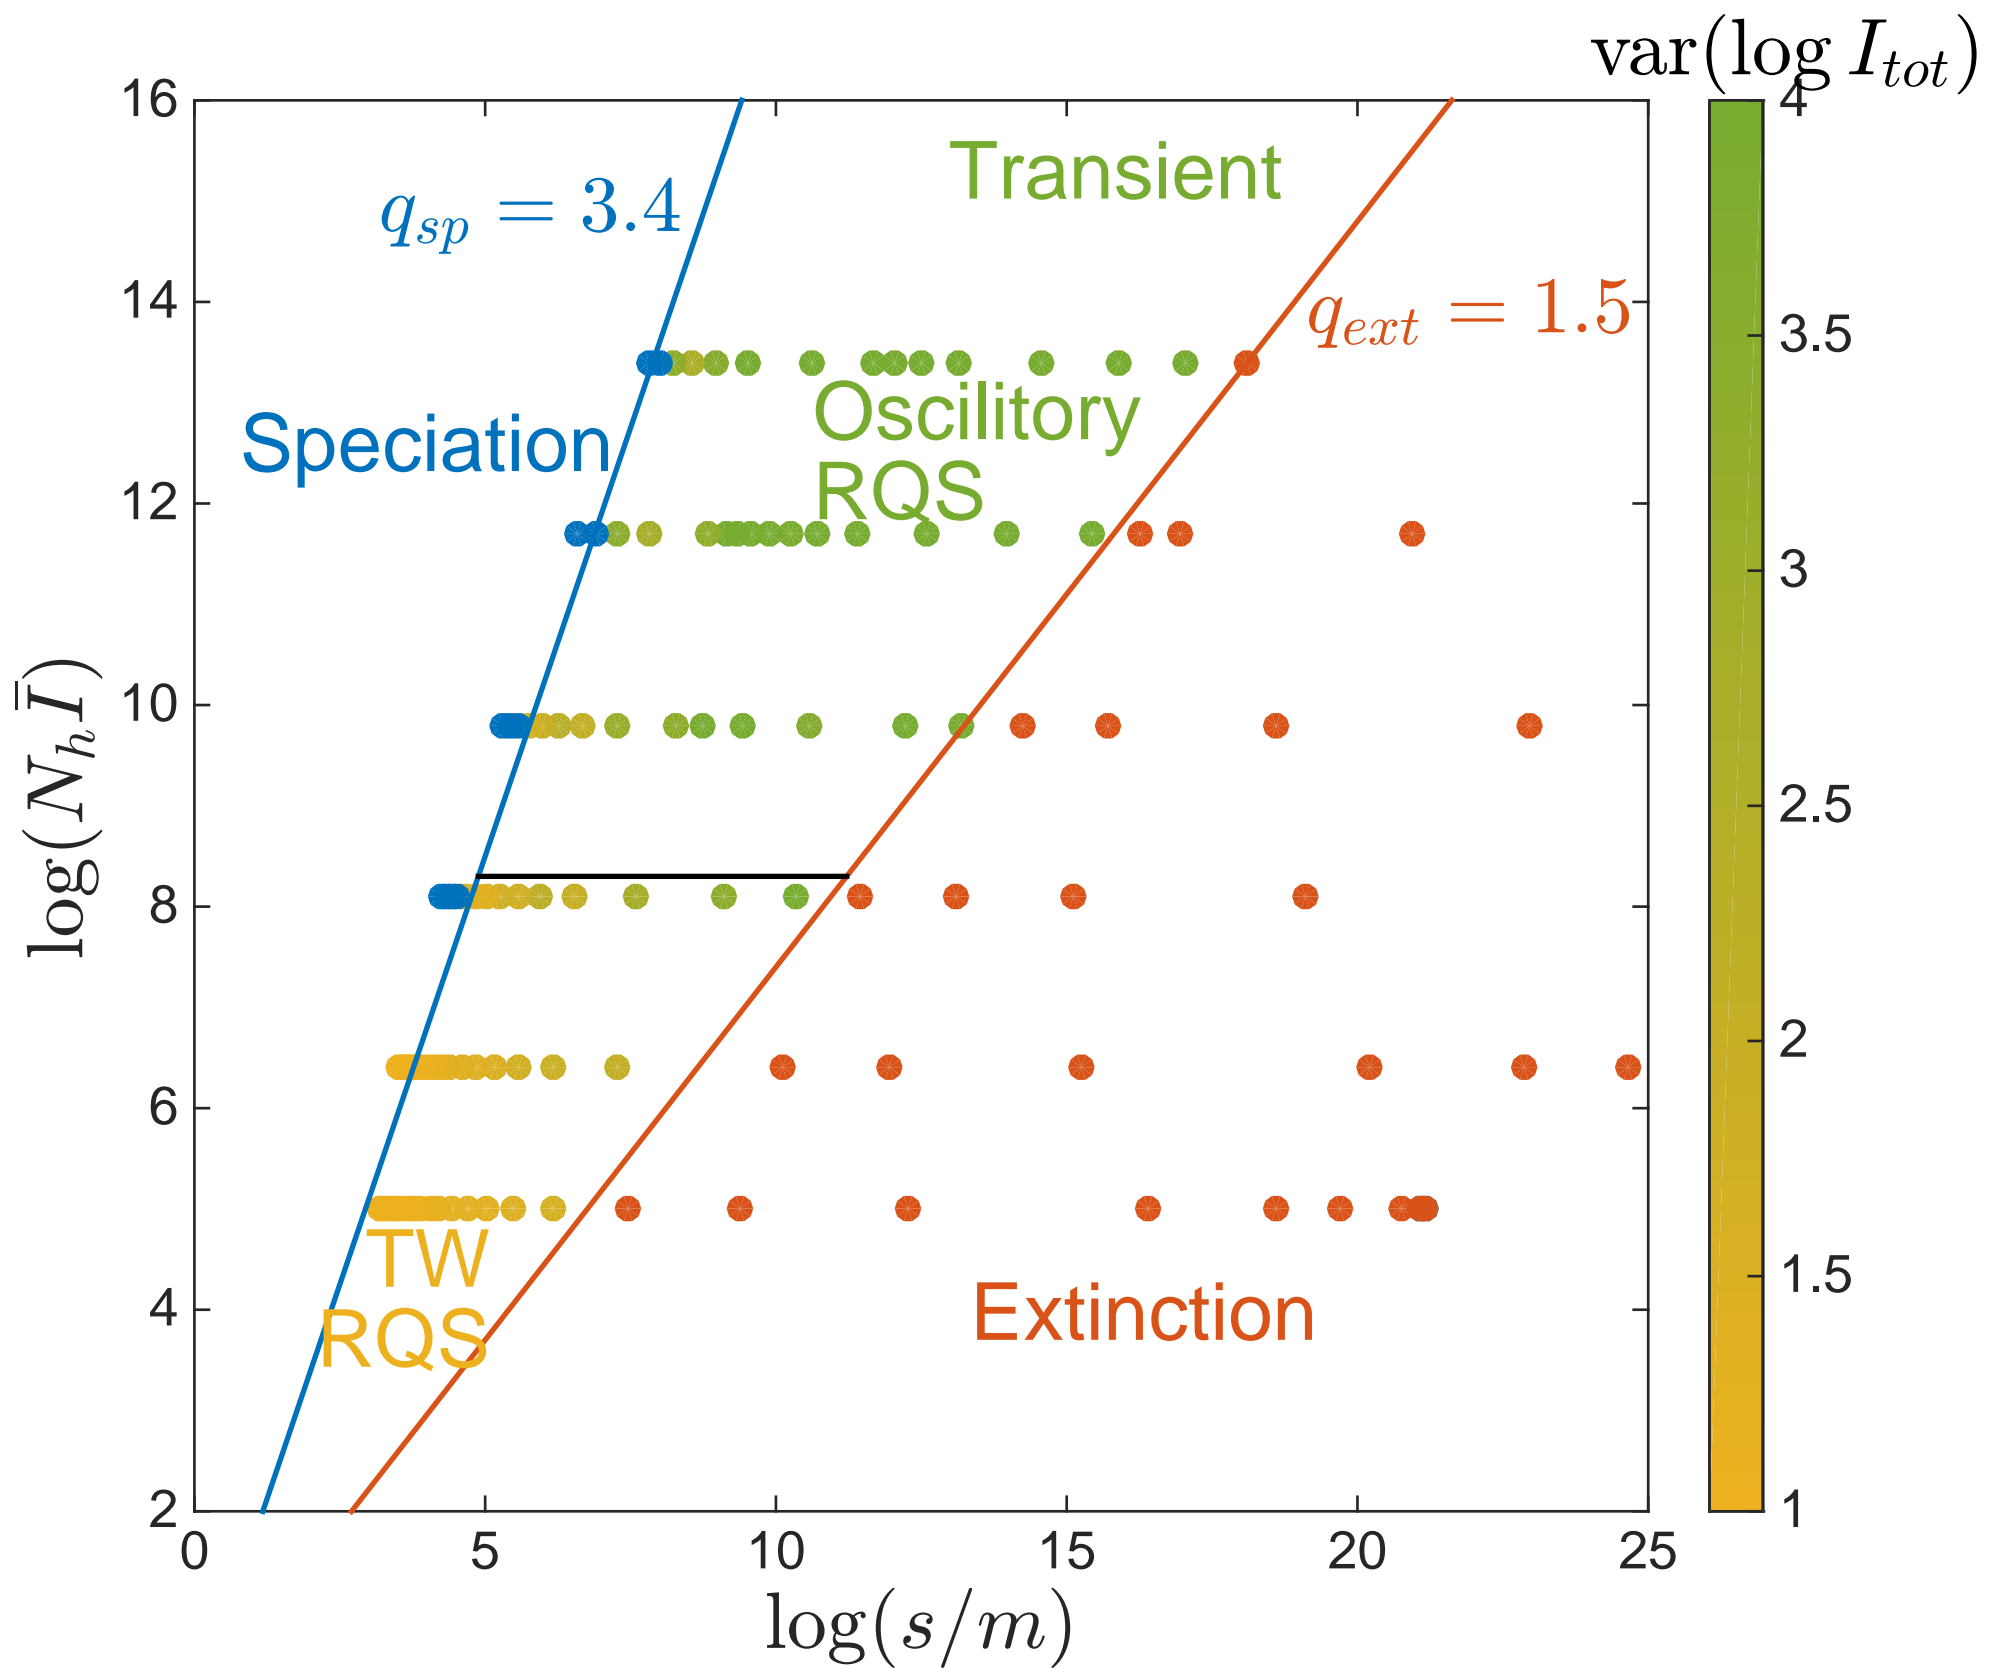

Supplement: supp [file elife-44205-supp-v1.zip]

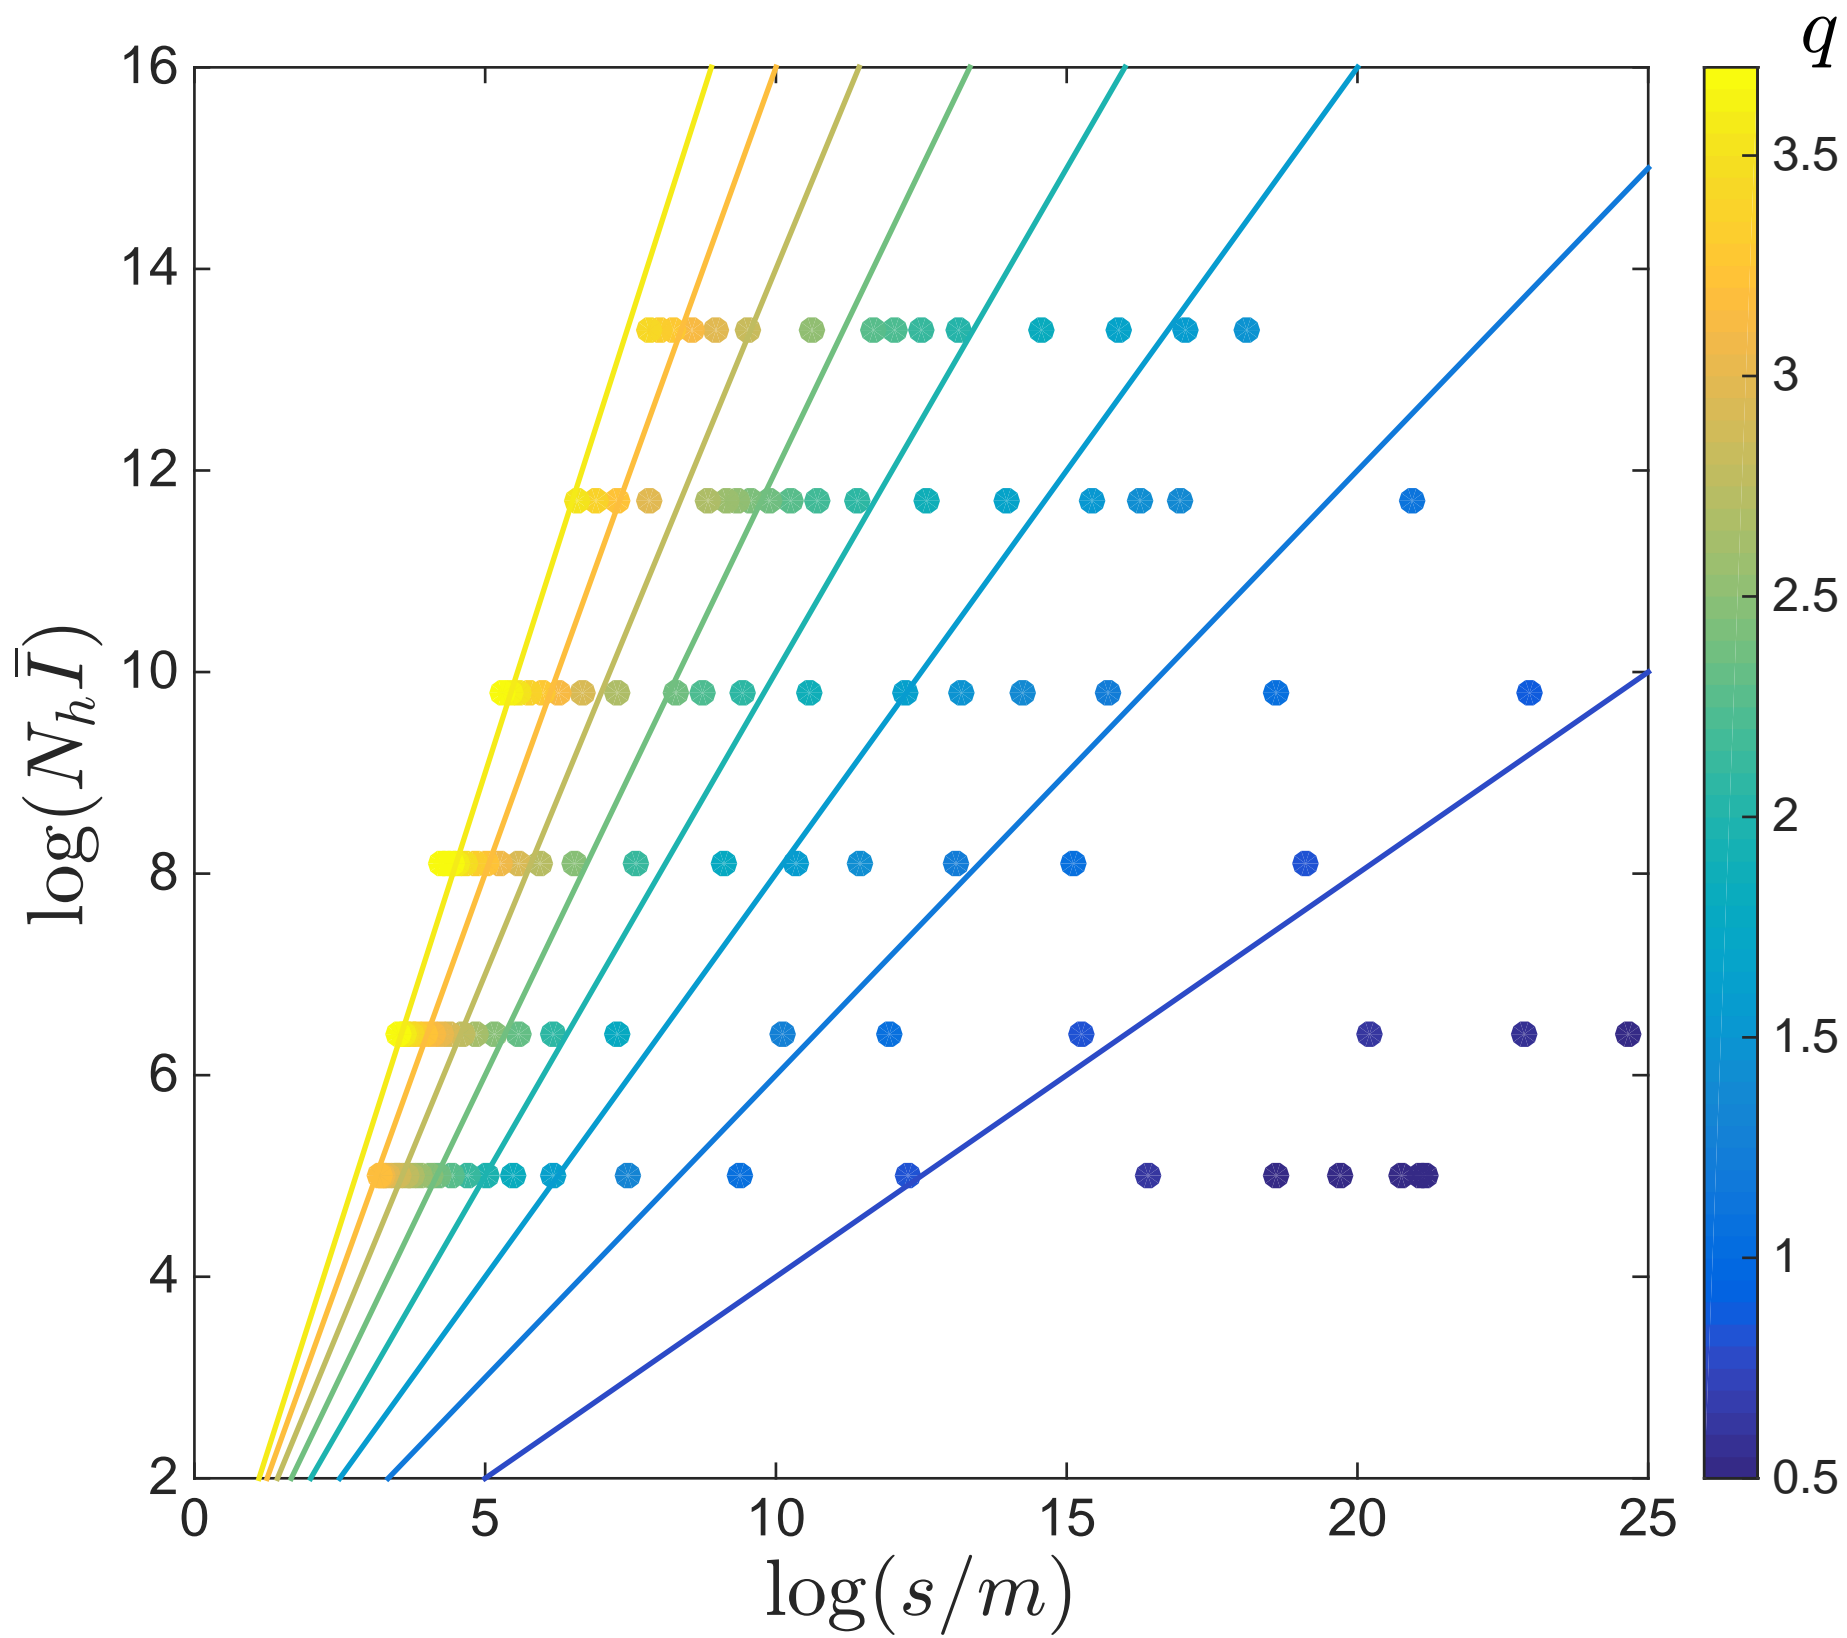

Supplement: supp [file elife-44205-supp-v1.zip]

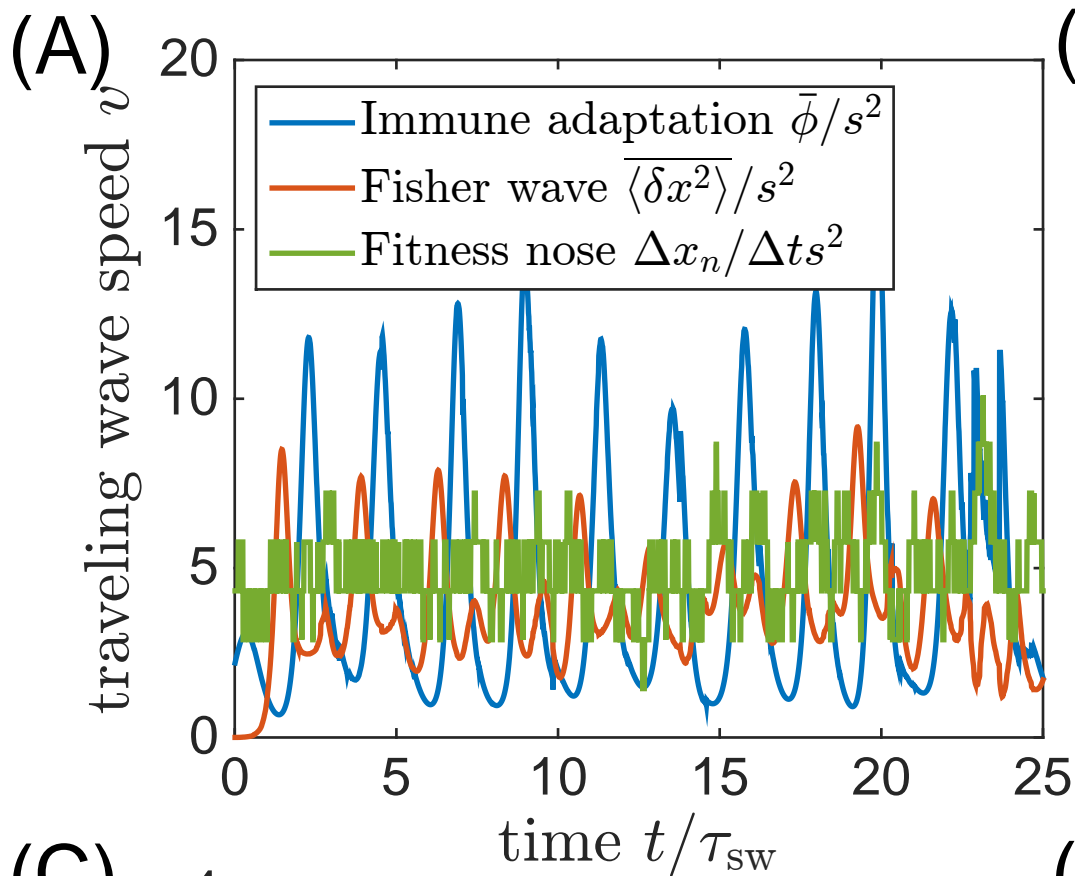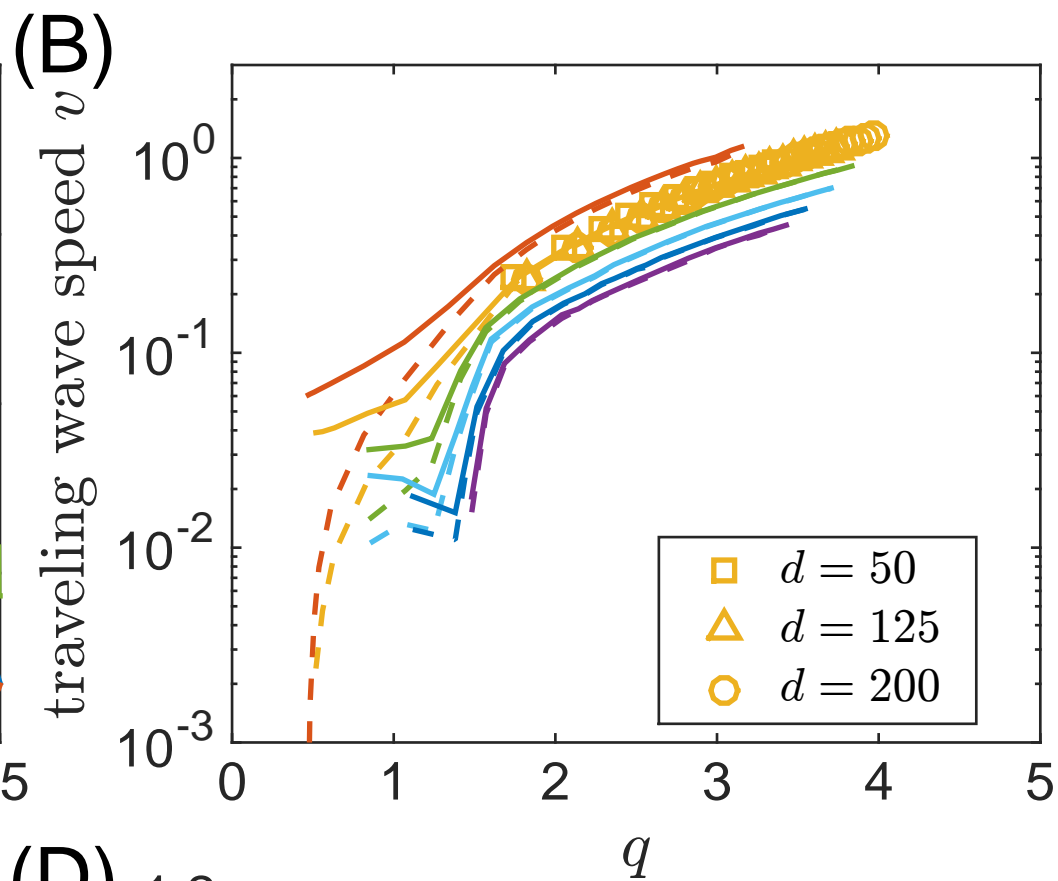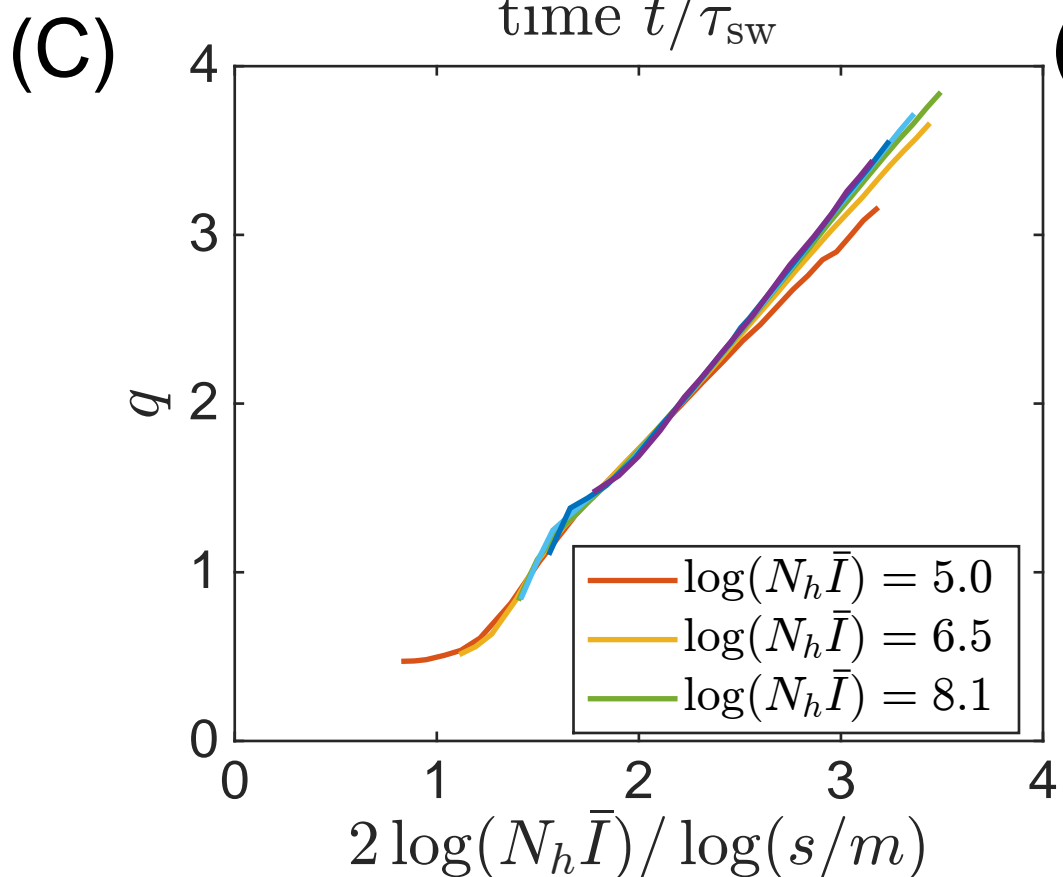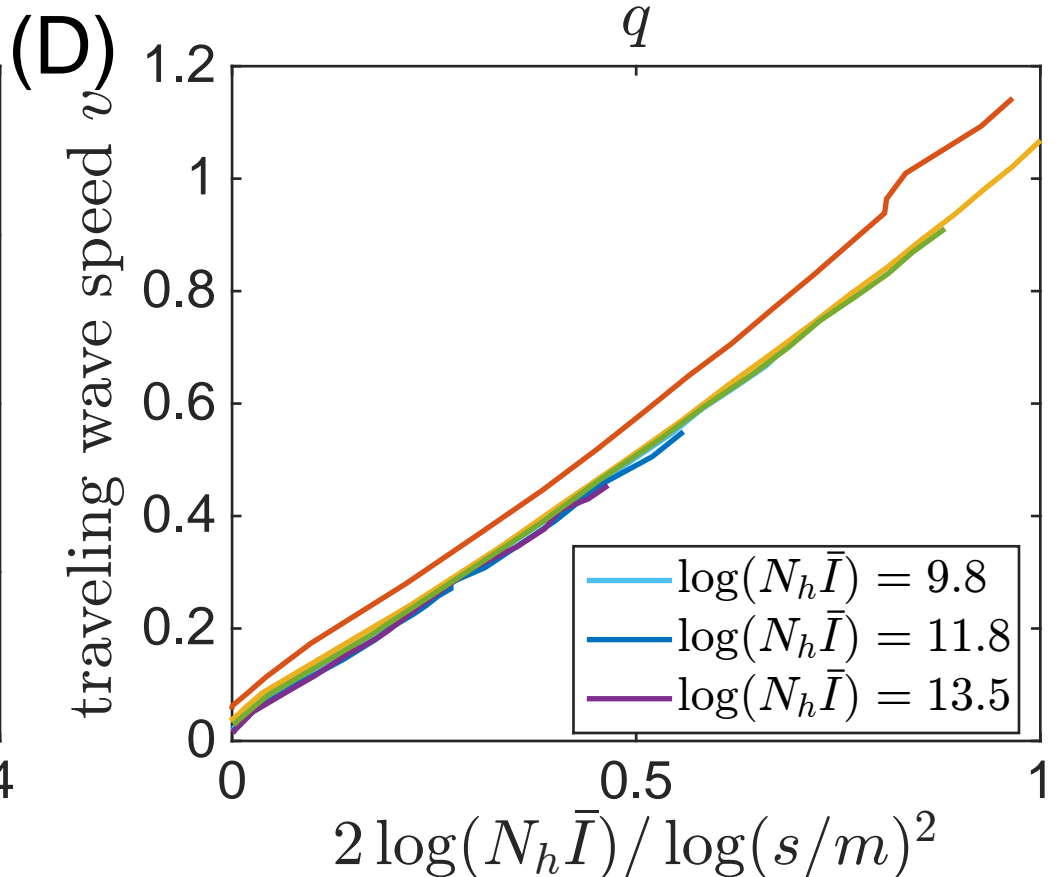

Supplement: supp [file elife-44205-supp-v1.zip]
